# Supplementary material for: Arene Ru(II) Complexes with Difluorinated Ligands Act as Potential Inducers of S-Phase Arrest via the Stabilization of c-myc G-Quadruplex DNA
Source: MDPI journal article supplement (doi:10.3390/molecules27061897), 2022-03-15
Supplement: s1 [file s1]

# Supporting Information for

## **Arene Ru(II) complexes with difluorinated ligands acted as potential inducer of S-phase arrest via stabilizing *c-myc* G-quadruplex DNA**

Liang Zeng <sup>1,#</sup>, Chanling Yuan <sup>2,#</sup>, Jing Shu <sup>2</sup>, Jiayi Qian <sup>2</sup>, Qiong Wu <sup>4</sup>, Yanhua Chen <sup>2</sup>, Ruzhen Wu <sup>2</sup>, Xiaoming Ou yang <sup>3,\*</sup>, Yuan Li <sup>1</sup>, and Wenjie Mei <sup>2,4,\*</sup>

<sup>1</sup>Department of Pathology, Guangzhou Women and Children's Medical Center, Guangzhou Medical University

<sup>2</sup>School of Pharmacy, Guangdong Pharmaceutical University; yuanban@gdpu.edu.cn

<sup>3</sup>Department of pathology, The Second Affiliated Hospital of Guangzhou Medical University

<sup>4</sup>Guangdong Province Engineering and Technology Centre for Molecular Probe and Biomedicine Imaging

\*Correspondence: wenjiemei@126.com; gzoyxm@163.com;

## Contents:

|                                                                                                                                         |             |
|-----------------------------------------------------------------------------------------------------------------------------------------|-------------|
| 1. ESI–MS spectra of ruthenium( II ) complexes (Figure S1- S8 )                                                                         | pages 1-4   |
| 2. <sup>1</sup> H-NMR and <sup>13</sup> C-NMR spectra of complexes (Figure S9-S16)                                                      | pages 5-12  |
| 3. Effect of <b>6</b> on the PCR-stop assay with <i>c-myc</i> G4 DNA(Figure S17)                                                        | pages 12    |
| 4. The stability of complex <b>6</b> in Tris buffer solution(Figure S18)                                                                | pages 13    |
| 5. Ligand(L <sub>2</sub> )- <i>c myc</i> G4 DNA interactions(Figure S19)                                                                | pages 13    |
| 6. The cytotoxic activity of the ligands and arene Ru(II)-modified compounds(Table S1)                                                  | pages 14    |
| 7. Multiple gene expression in glioblastoma multiforme(Figure S20)                                                                      | pages 14    |
| 8. Binding site and mode of the arene Ru(II) complexes interacted with c-myc G-quadruplex DNA analyzed by molecular docking(Figure S21) | pages 14-15 |
| 9. The UV–vis absorption titrations of arene Ru(II) complexes modified with and without F atom(Figure S22)                              | pages 16    |

# 1. ESI-MS spectra of ruthenium( II ) complexes

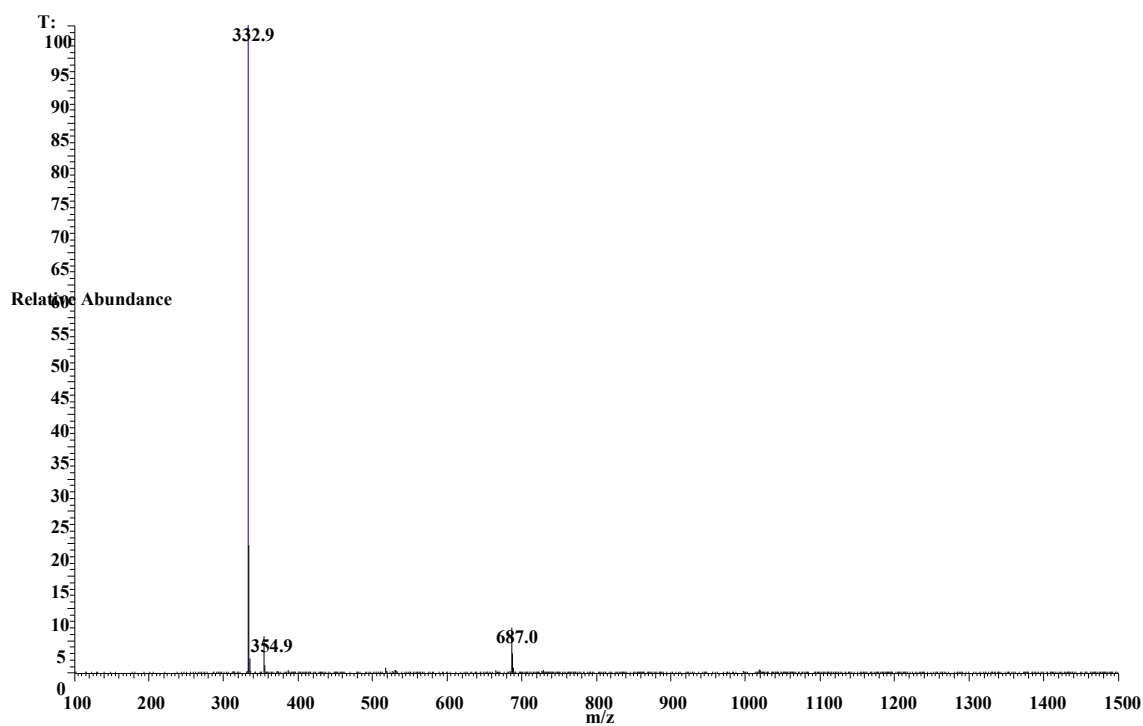

Figure S1. ESI-MS spectra of ligand L<sub>1</sub>.

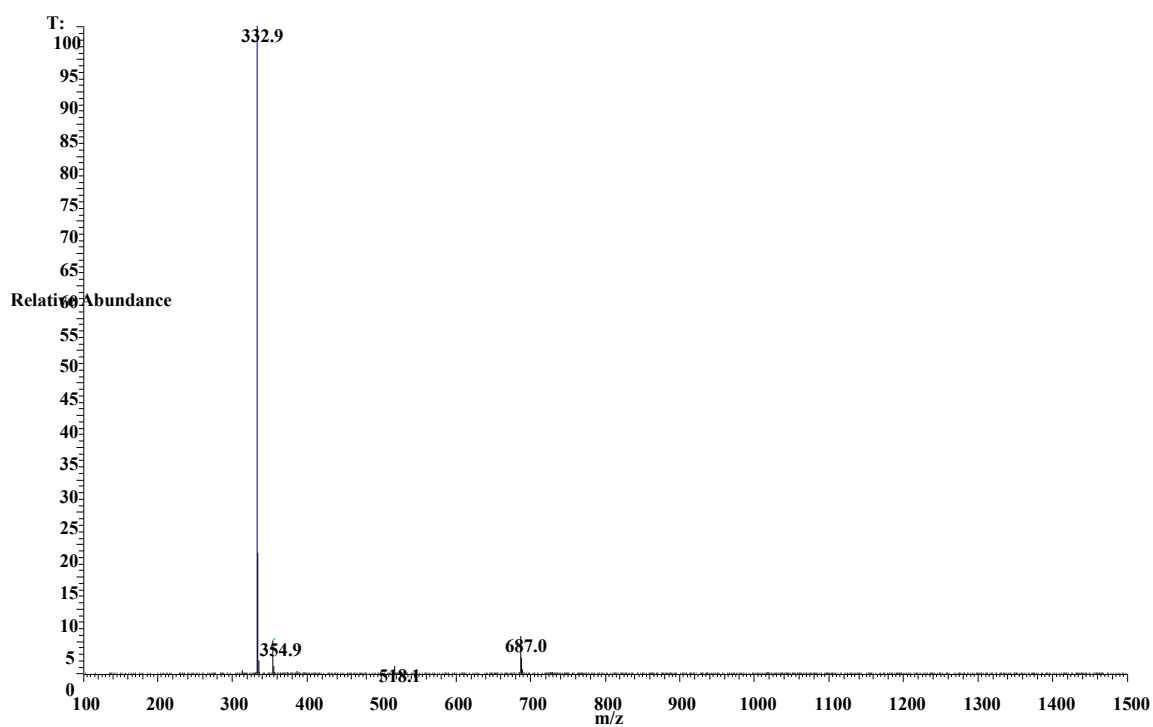

Figure S2. ESI-MS spectra of ligand L<sub>2</sub>.

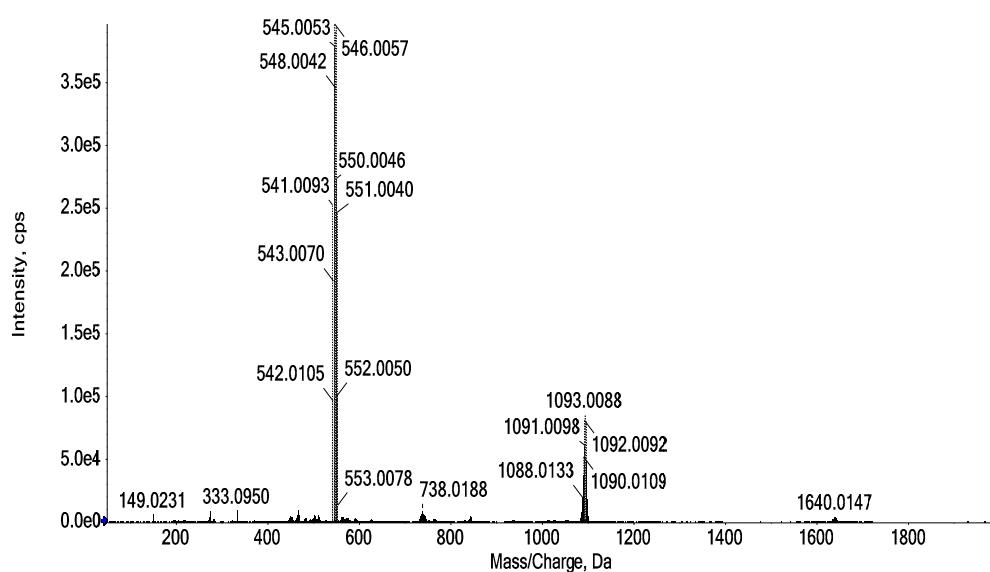

**Figure S3.** ESI-MS spectra of complex **1**.

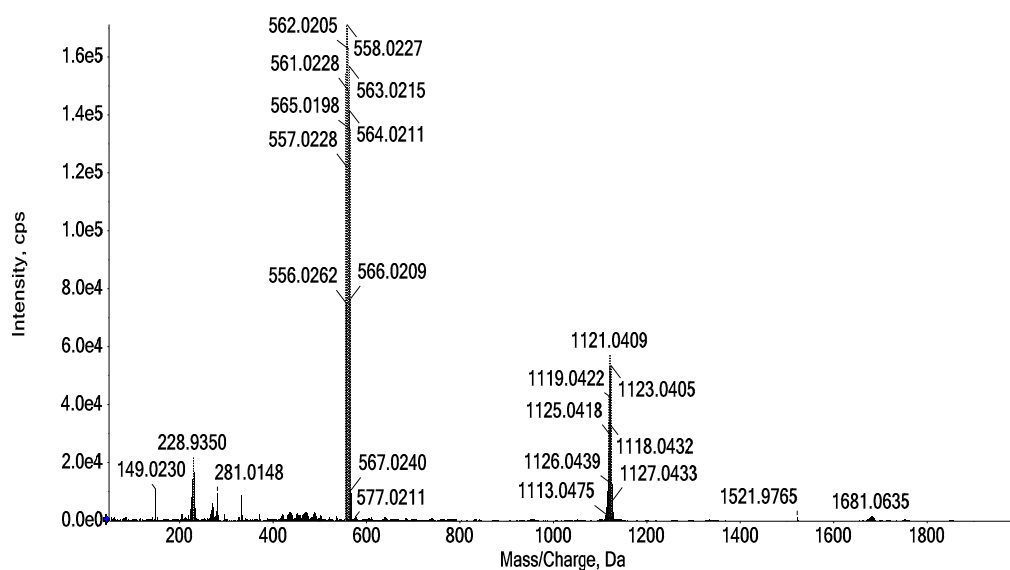

**Figure S4.** ESI-MS spectra of complex **2**.

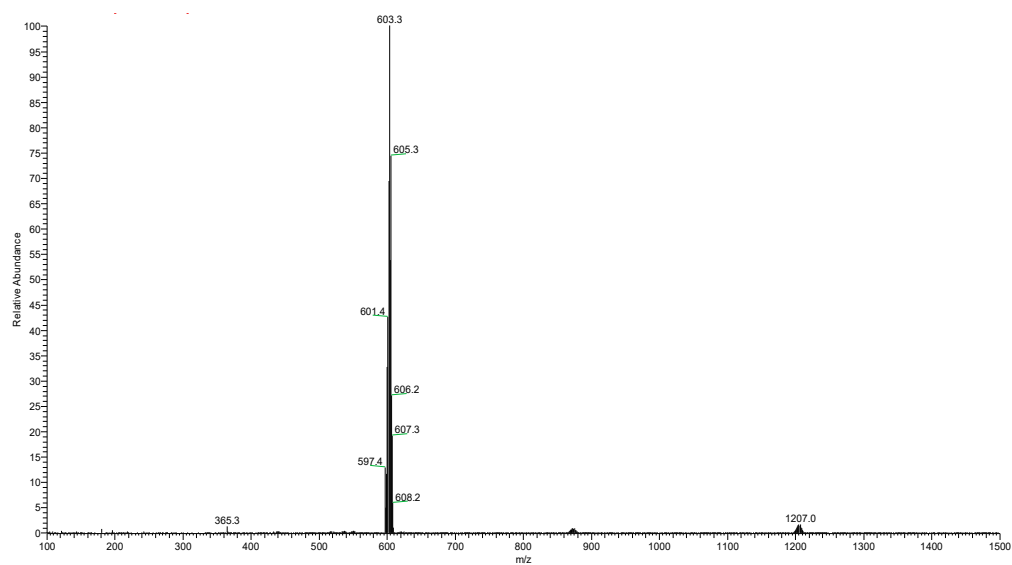

**Figure S5.** ESI-MS spectra of complex **3**.

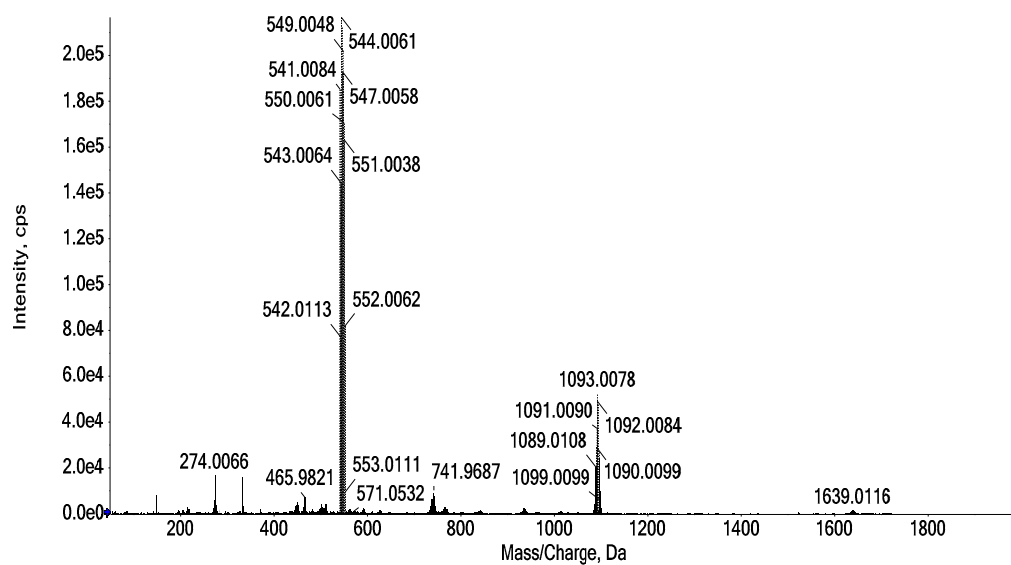

**Figure S6.** ESI-MS spectra of complex **4**.

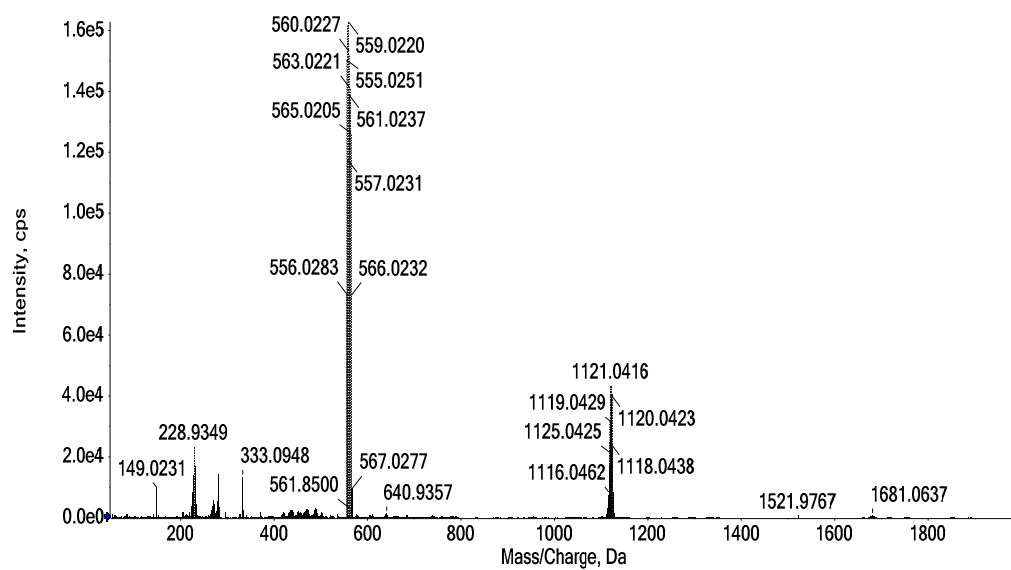

**Figure S7.** ESI-MS spectra of complex **5**.

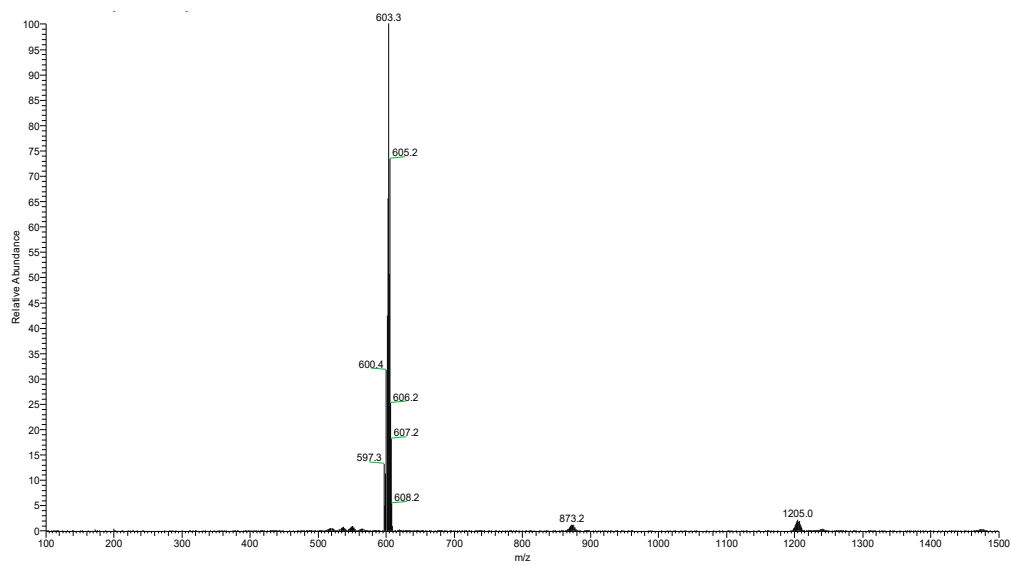

**Figure S8.** ESI-MS spectra of complex **6**.

## 2. $^1\text{H}$ -NMR and $^{13}\text{C}$ -NMR spectra of complexes

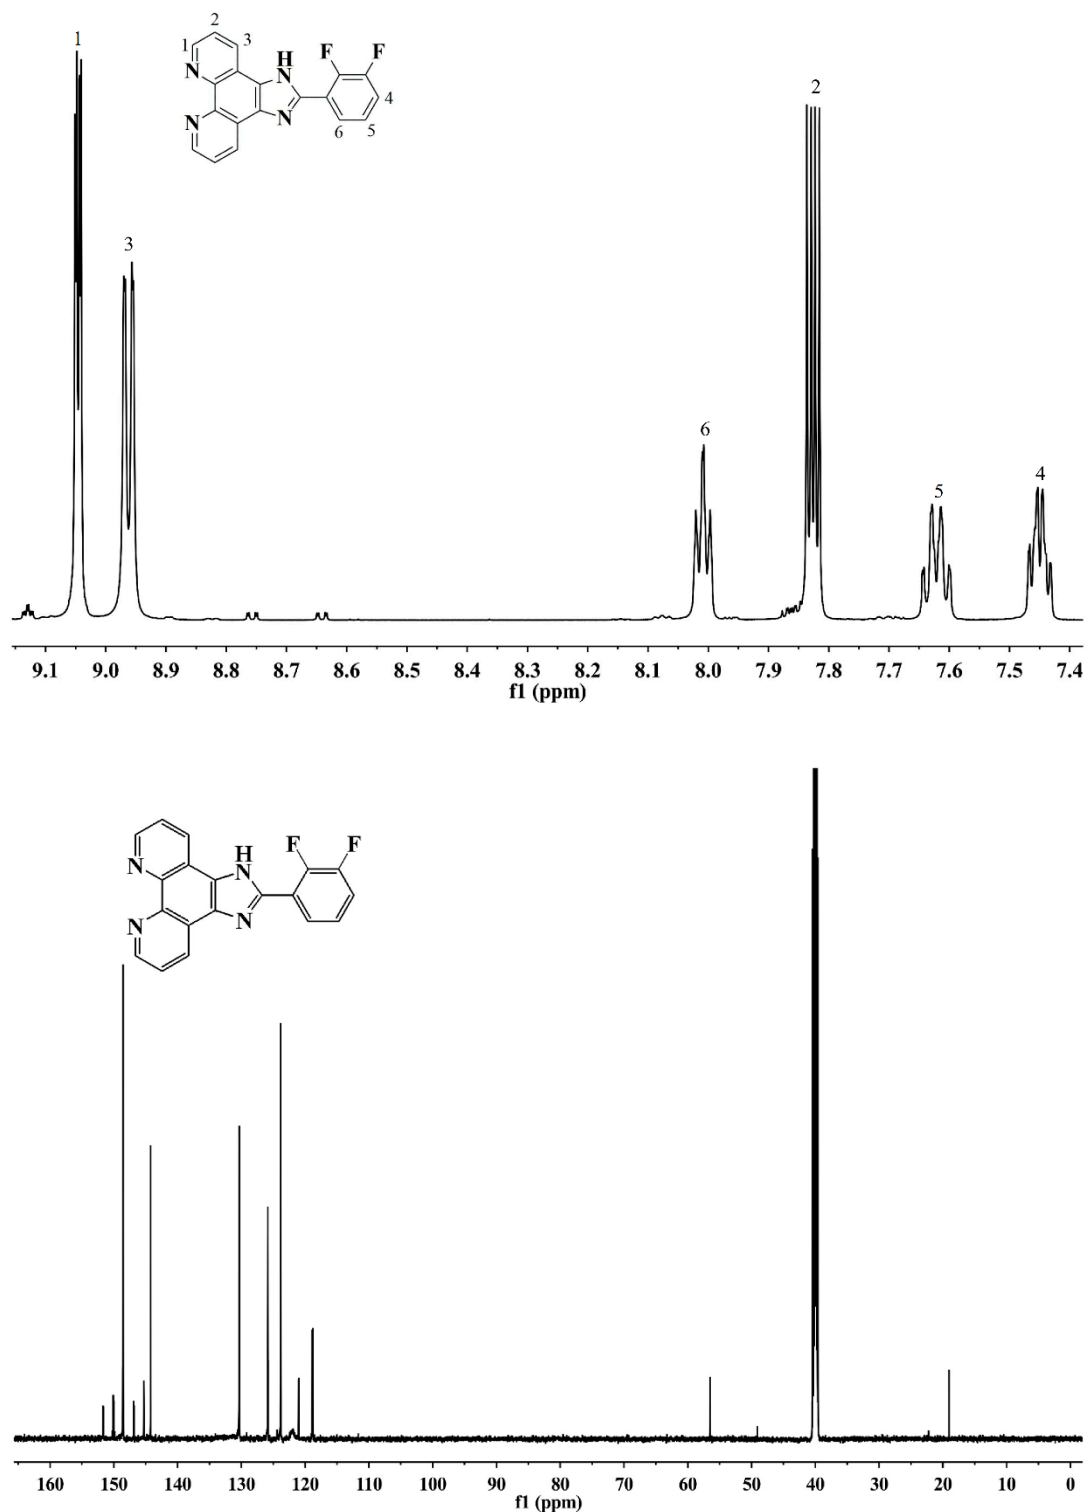

**Figure S9.**  $^1\text{H}$ -NMR and  $^{13}\text{C}$ -NMR spectra of ligand  $\text{L}_1$ .

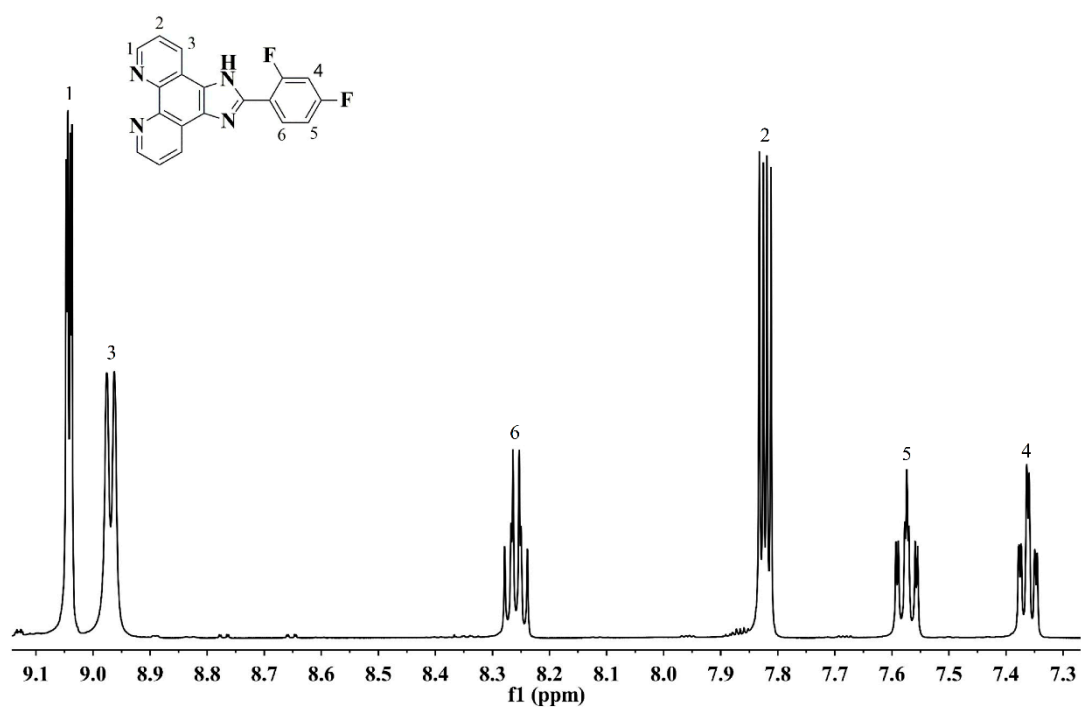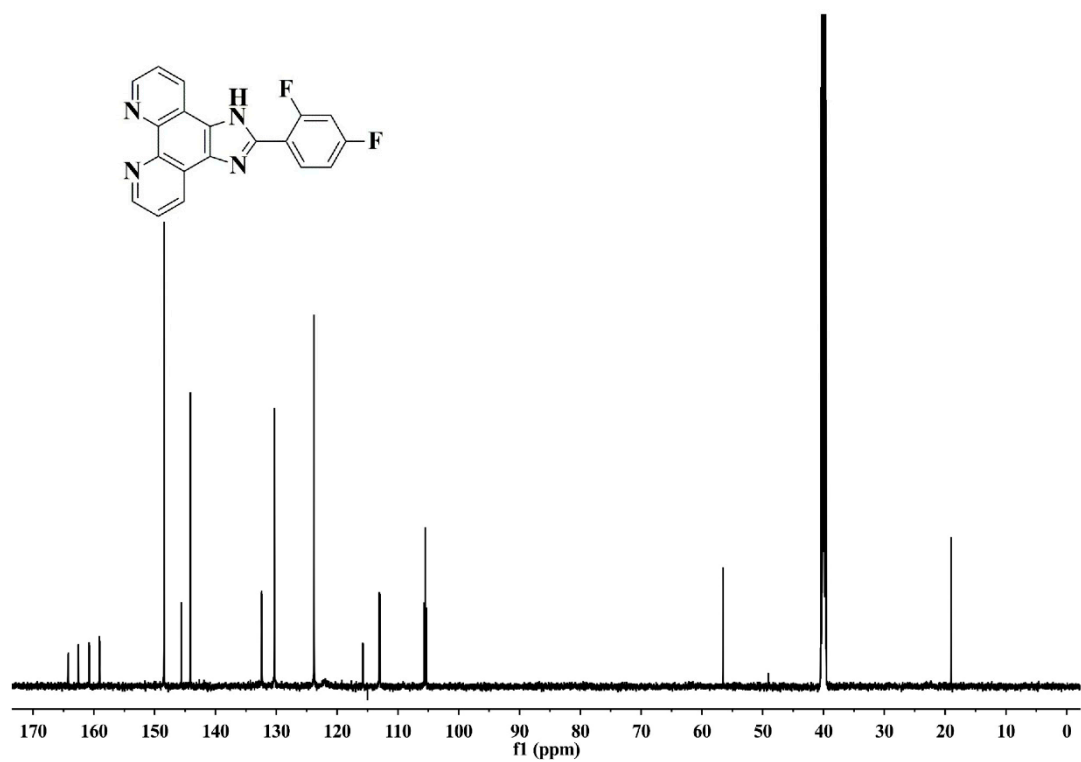

**Figure S10.** <sup>1</sup>H-NMR and <sup>13</sup>C-NMR spectra of ligand L<sub>2</sub>.



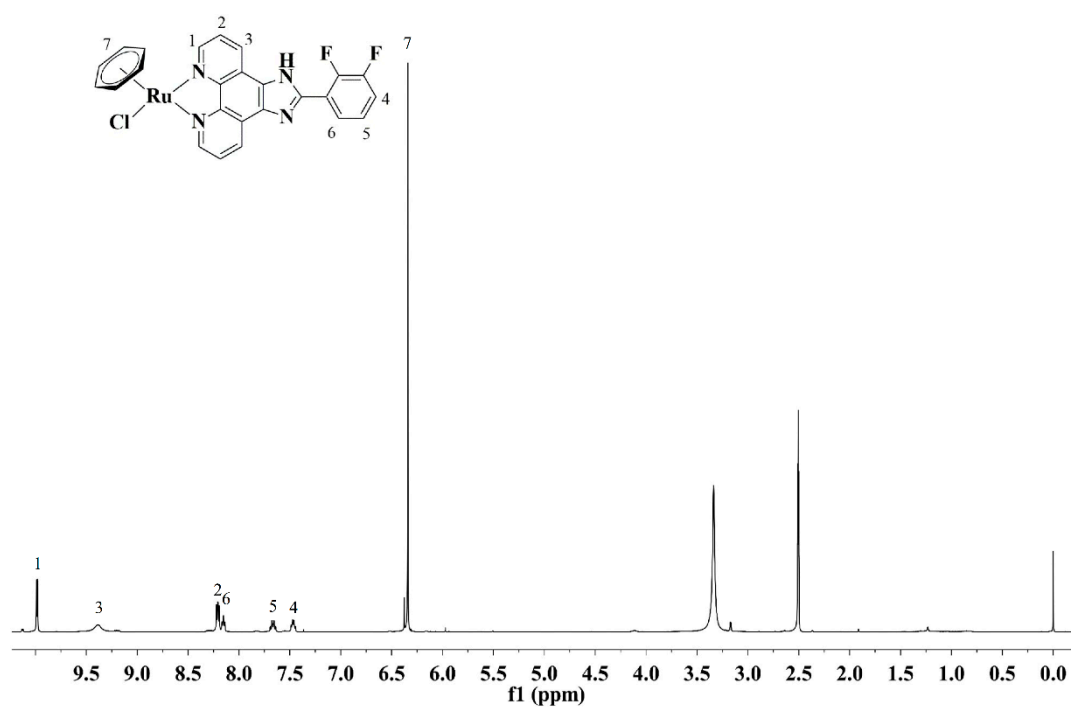

**Figure S11.**  $^1\text{H}$ -NMR spectra of complex **1**.

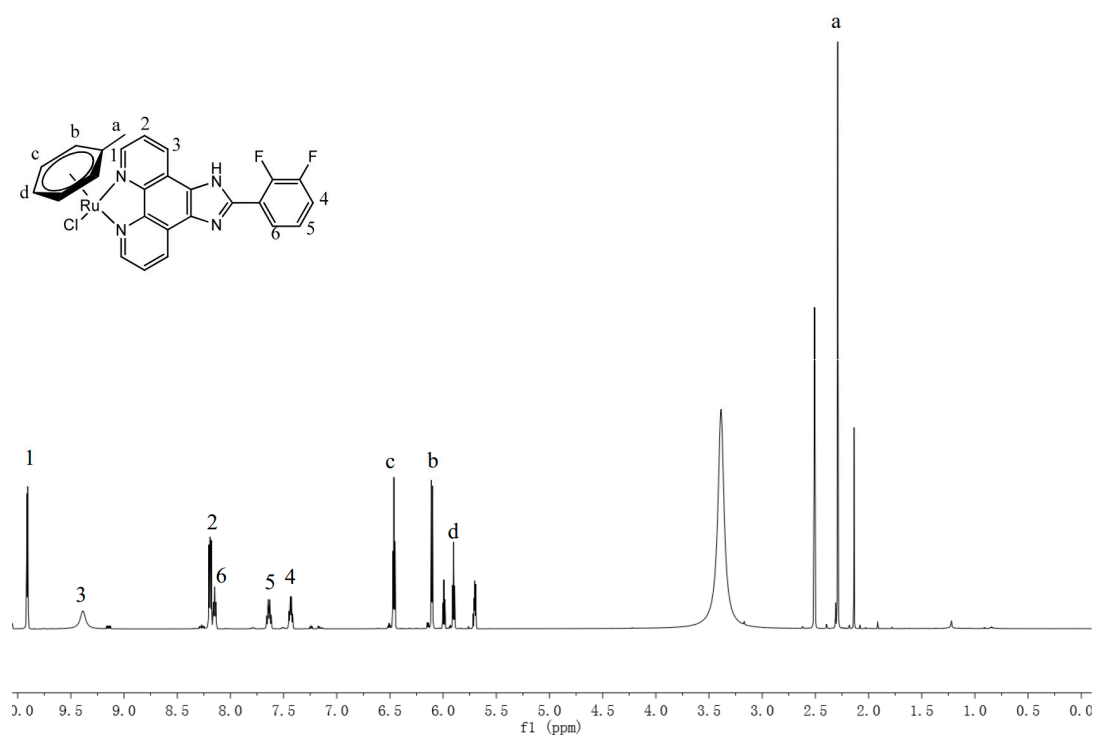

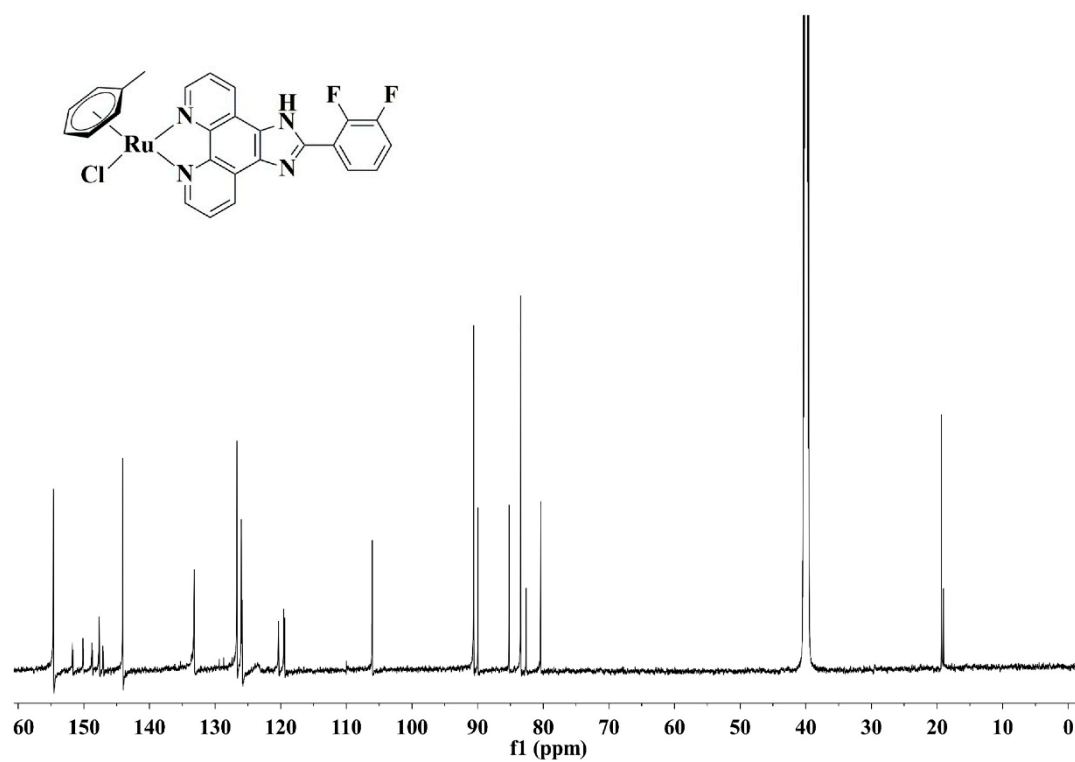

**Figure S12.**  $^1\text{H}$ -NMR and  $^{13}\text{C}$ -NMR spectra of complex **2**.

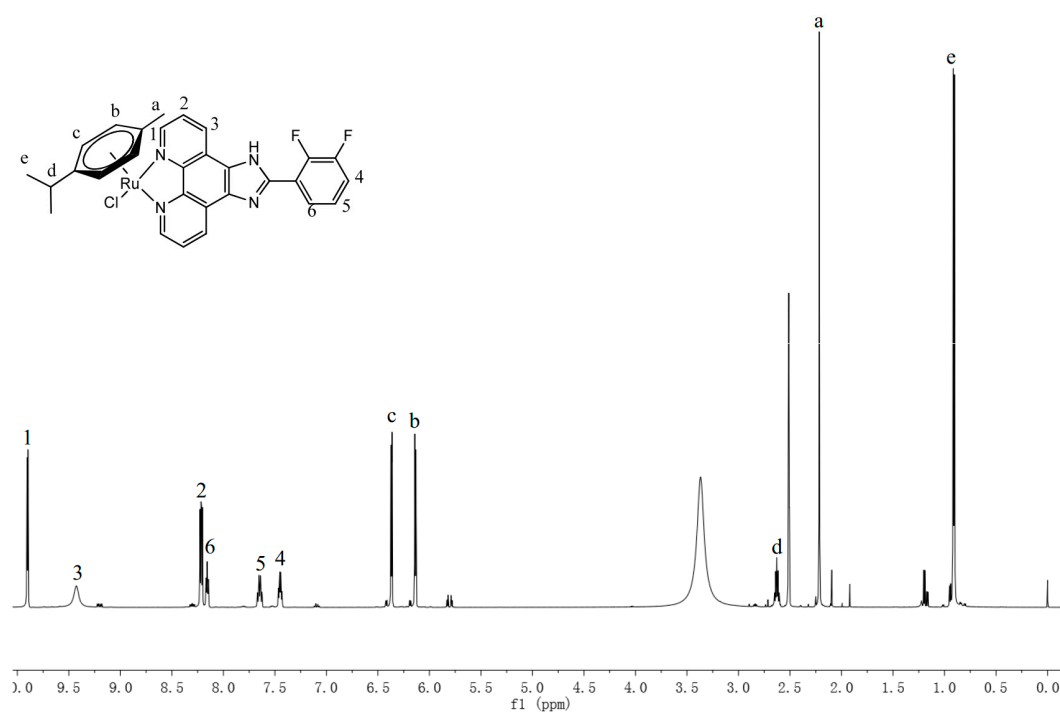

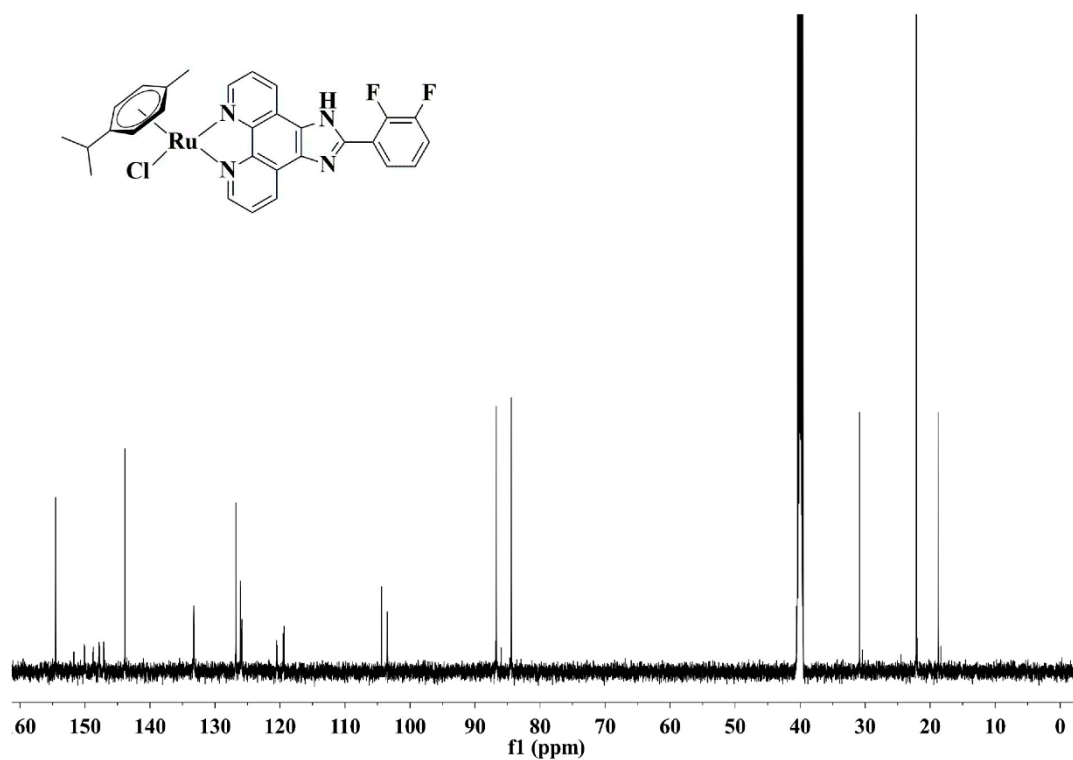

**Figure S13.** <sup>1</sup>H-NMR and <sup>13</sup>C-NMR spectra of complex 3.

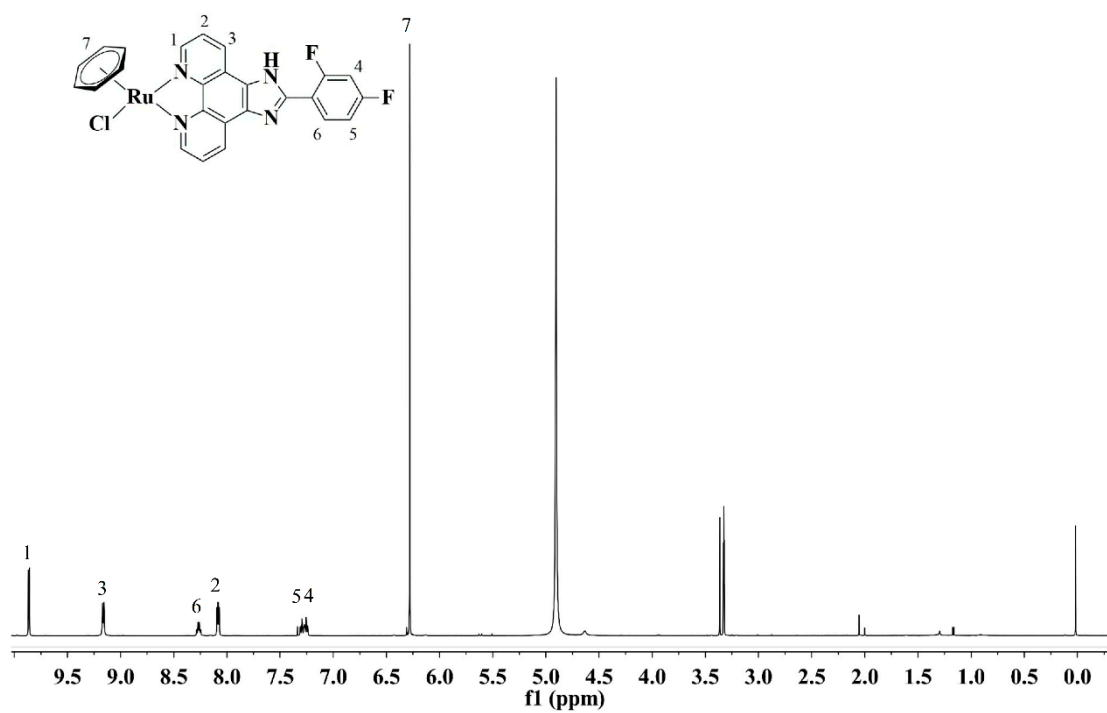

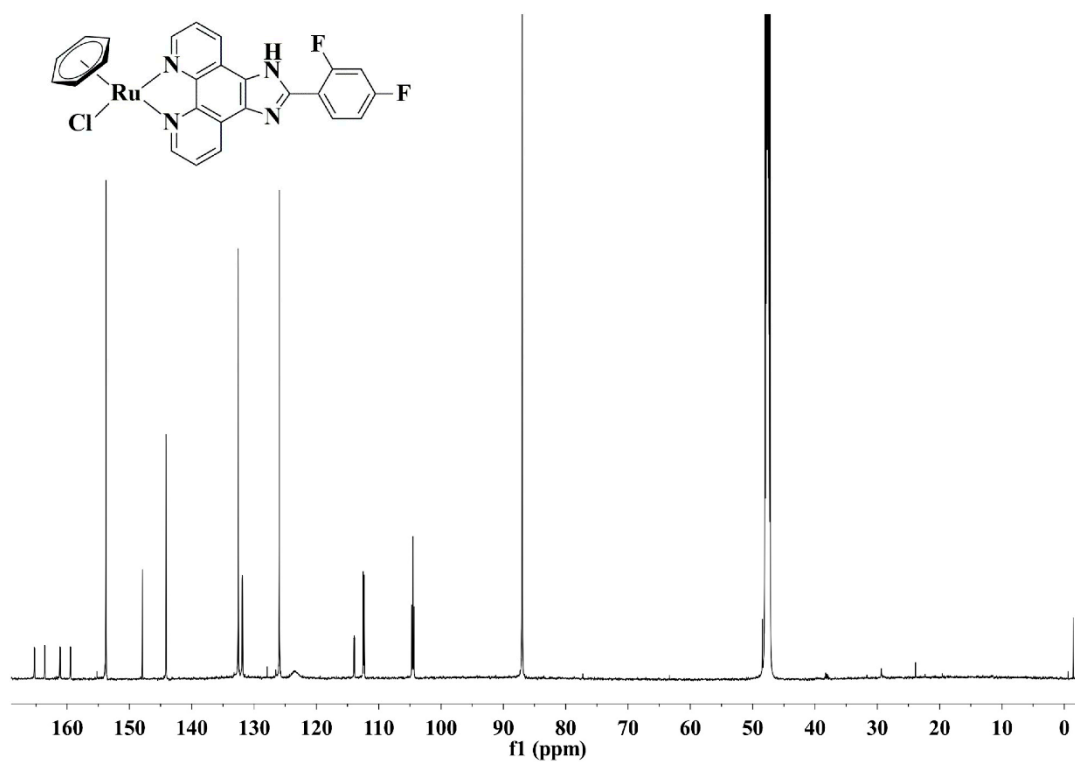

**Figure S14.**  $^1\text{H}$ -NMR and  $^{13}\text{C}$ -NMR spectra of complex **4**.

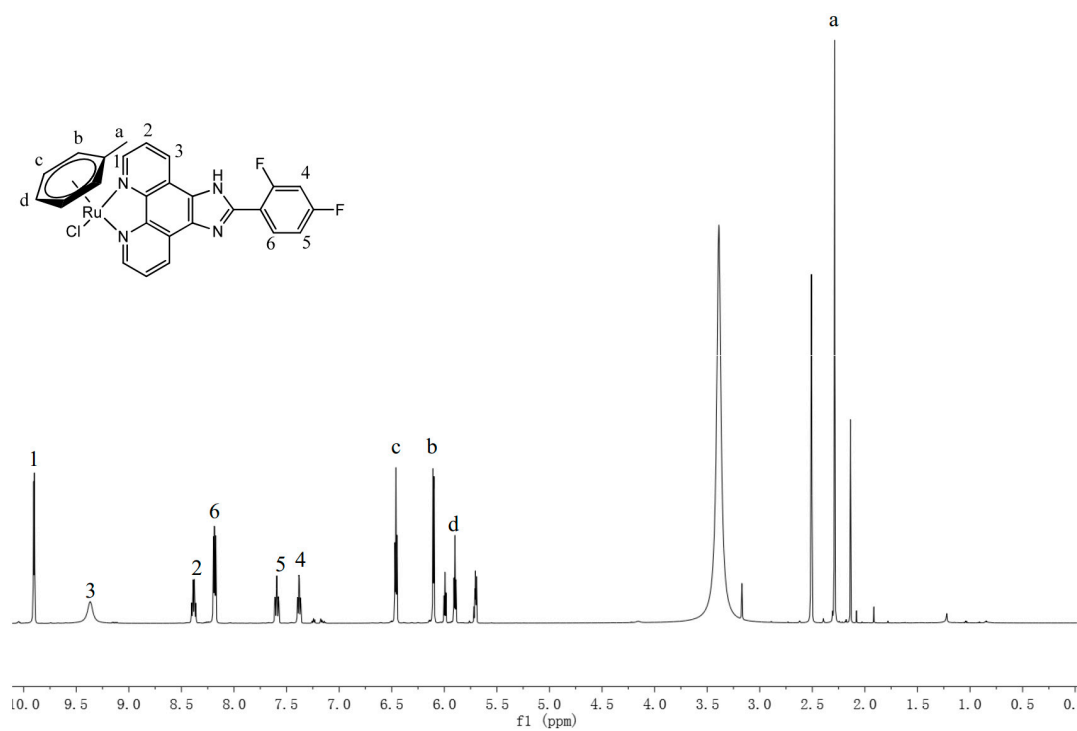

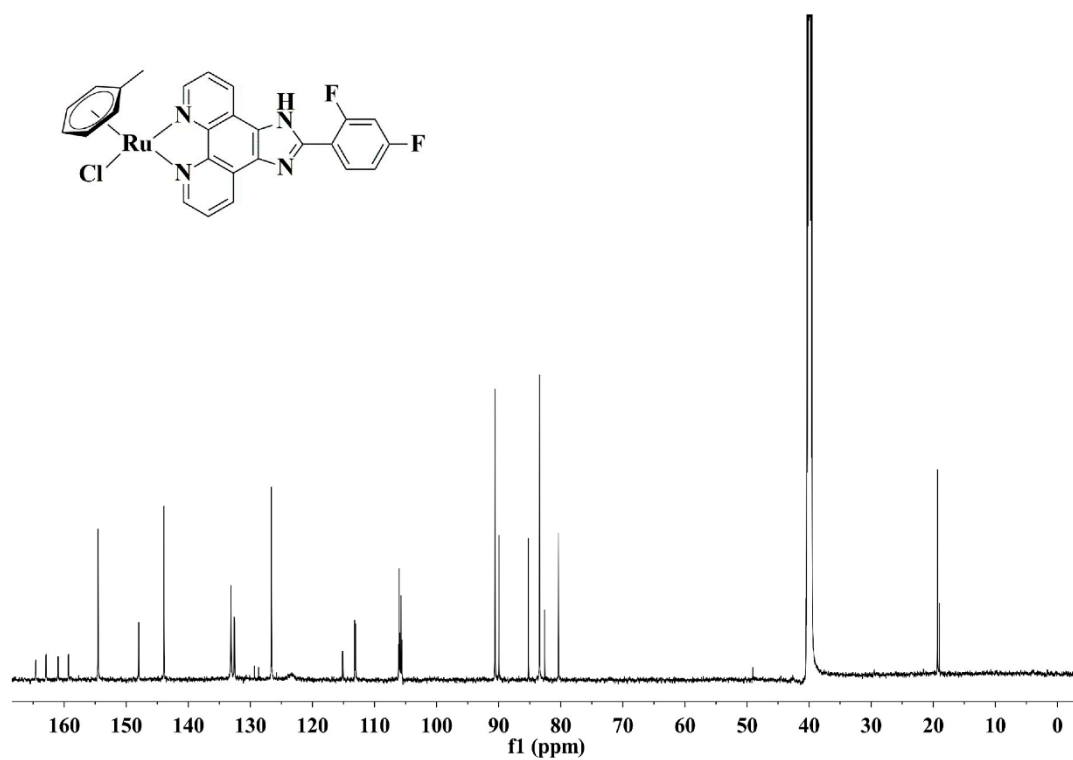

**Figure S15.**  $^1\text{H}$ -NMR and  $^{13}\text{C}$ -NMR spectra of complex **5**.

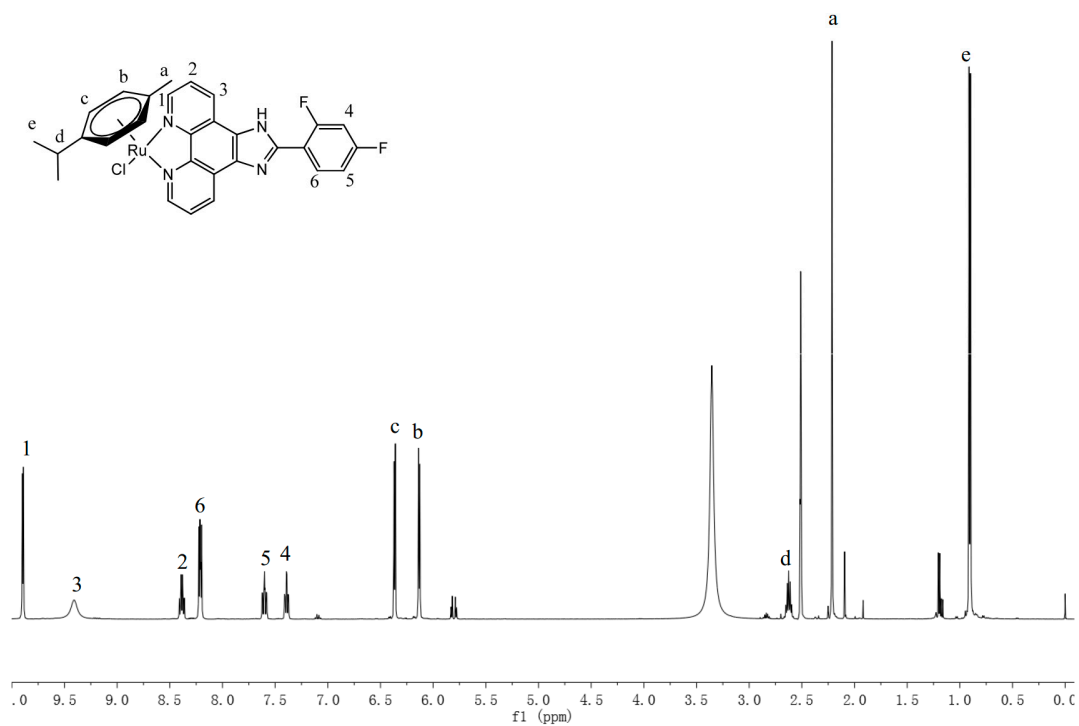

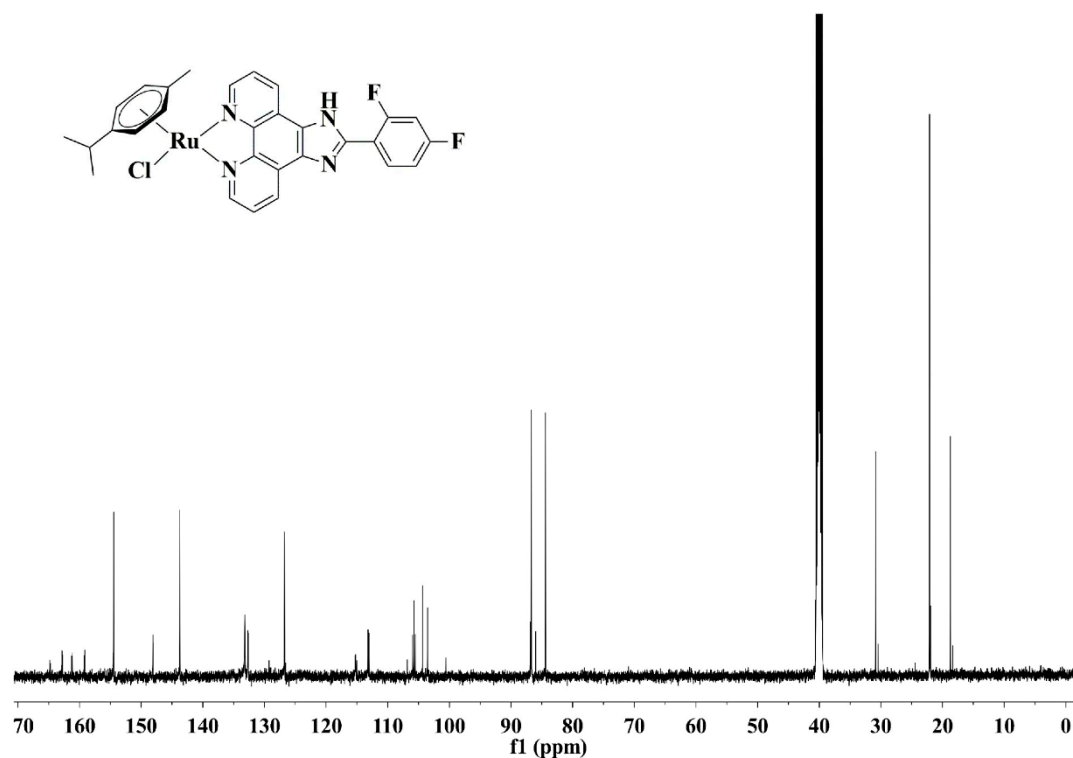

**Figure S16.** <sup>1</sup>H-NMR and <sup>13</sup>C-NMR spectra of complex 6.

### 3. Effect of 6 on the PCR-stop assay with *c-myc* G4 DNA

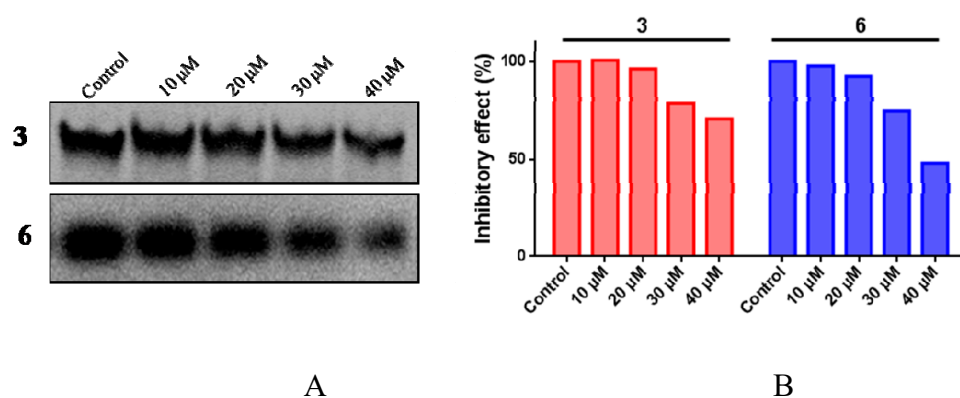

**Figure S17.** (A) The inhibitory effect of complexes 3 and 6 on the PCR-stop assay with *c-myc* G-quadruplex DNA. [Ru] = 0, 10, 20, 30 and 40 μM, [*c-myc*] = 10 pM. (B) The replication blocking of PCR products obtained for different complex concentrations.

#### 4. The stability of complex 6 in Tris buffer solution

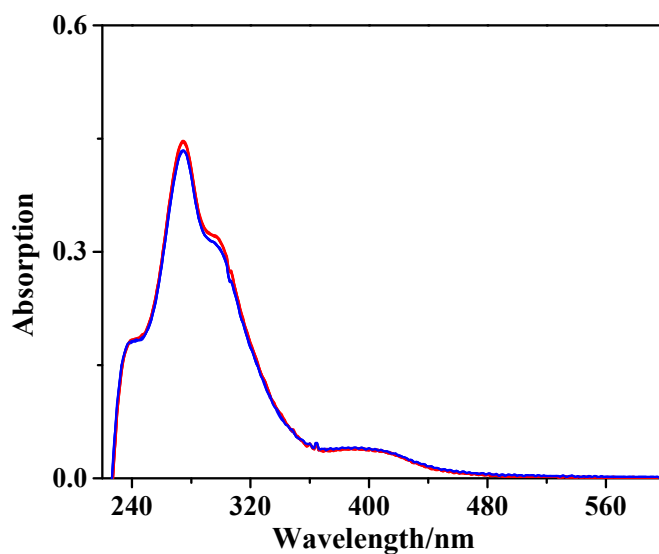

**Figure S18.** The stability of **6** in Tris buffer solution. The red line is the data from day one, and the blue line is the data from day three. The variation value of absorption peak is 2.7%. The experimental results showed that the UV-vis spectra of the compound after three days in the buffer solution were consistent with that of the first day of preparation. Deviation but permissible.

#### 5. Ligand(L<sub>2</sub>)-*c myc* G4 DNA interactions

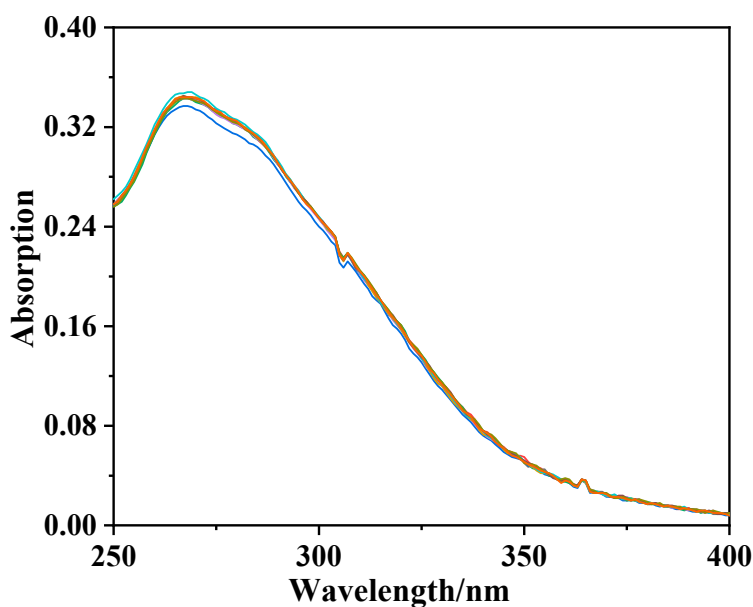

**Figure S19.** Ligand(L<sub>2</sub>)-*c myc* G4 DNA interactions. UV-visible spectra of 2-(2,4-di-fluorophenyl) imidazole[4,5f] [1,10]-phenanthroline (L<sub>2</sub>) in 10 mM Tris-HCl buffer (pH 7.4) containing 100 mM KCl. [DNA]=100  $\mu$ M. The UV absorption peak of the ligand L<sub>2</sub> did not change significantly after the addition of DNA. Compared with the difluorine modified compounds, the binding ability of the ligand to DNA was poor.

## 6. The cytotoxic activity of the ligands and arene Ru(II)-modified compounds

**Table S1.** The cytotoxic activities of complexes against human keratinocyte Haca cells after 72 h incubation.

| Comp.         | L <sub>1</sub>  | L <sub>2</sub>  | 3                | 6                |
|---------------|-----------------|-----------------|------------------|------------------|
| IC50/ $\mu$ M | 1.85 $\pm$ 0.03 | 2.72 $\pm$ 0.06 | 68.15 $\pm$ 1.77 | 79.32 $\pm$ 0.83 |

## 7. Multiple gene expression in glioblastoma multiforme

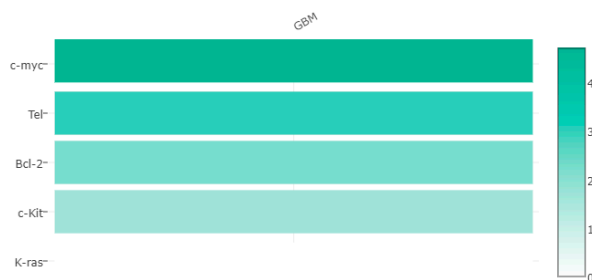

**Figure S20.** Multiple gene expression in glioblastoma multiforme(Copyright © 2017 Zefang Tang, Chenwei Li, Boxi Kang. Zhang's Lab.). The darker the color, the higher the gene expression in glioblastoma multiforme. As shown in the heat map, *c-myc* gene is highly expressed in glioblastoma multiforme (GBM) compared with other G-quadruplex DNA (*Tel*, *Bcl-2*, *c-kit*, *k-ras*).

## 8. Binding site and mode of the arene Ru(II) complexes interacted with *c-myc* G-quadruplex DNA analyzed by molecular docking

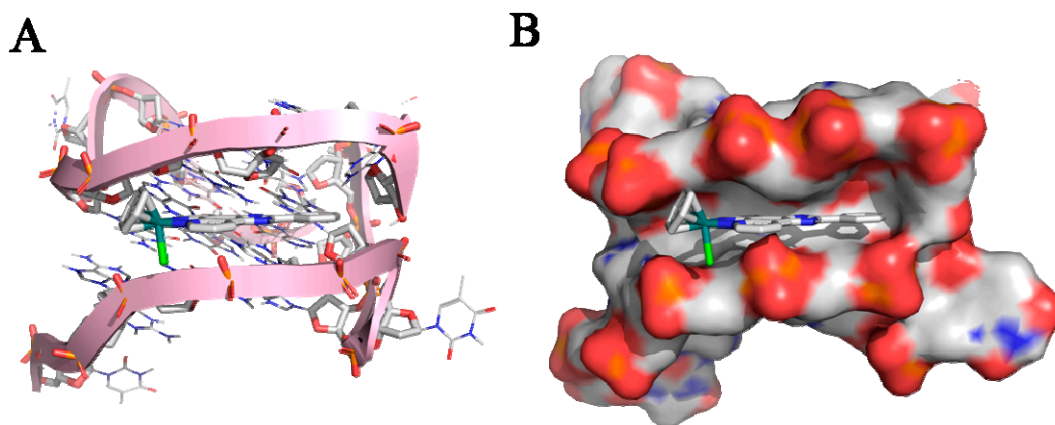



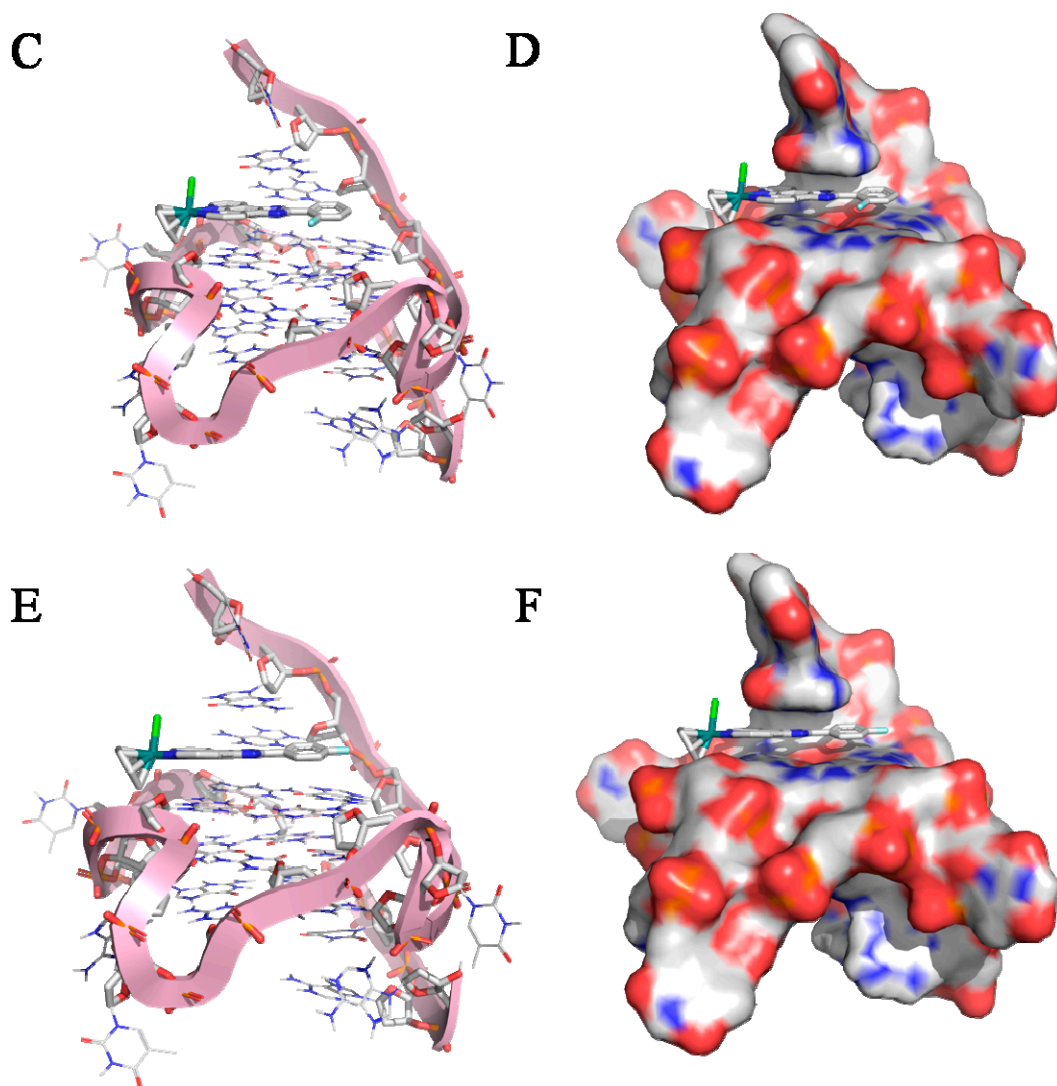

**Figure S21.** Binding site and mode of the arene Ru(II) complexes interacted with *c-myc* G-quadruplex DNA analyzed by molecular docking. Right (G-quadruplex is rendered with hydrophobic surface of molecular structure), Left (G-quartets are displayed in a stick mode) (A) without F atom, (B) F atom at ortho-position, (C) F atom at ortho-position.

9. The UV-vis absorption titrations of arene Ru(II) complexes modified with and without F atom.

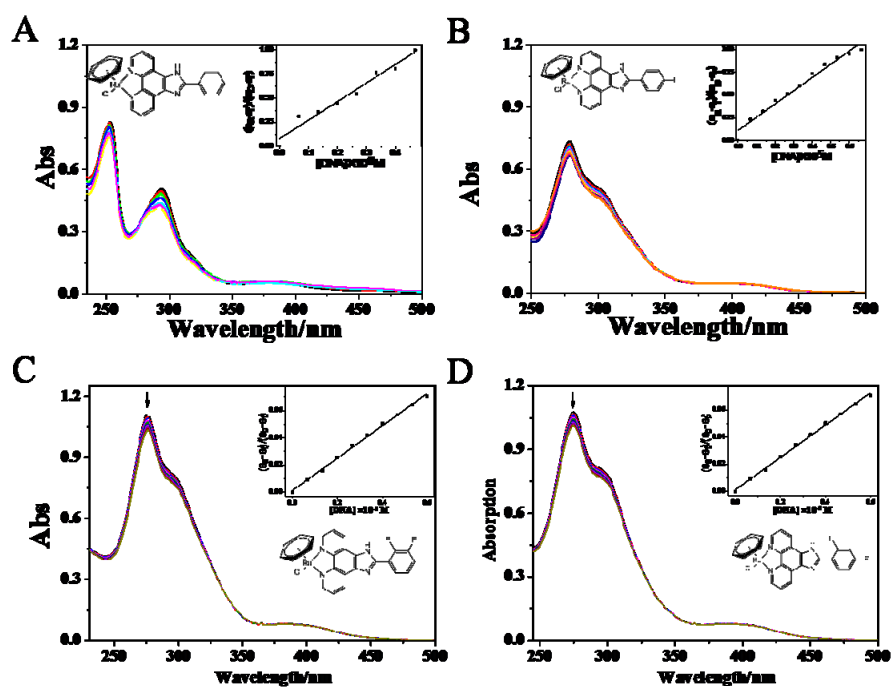

**Figure S22.** The UV-vis absorption titrations of arene Ru(II) complexes modified with and without F atom at concentration of 20  $\mu\text{M}$  with the increasing of *c-myc* in the Tris-HCl-KCl buffer.
